# Supplementary material
Source: publisher figshare collection journal article supplement (https://springernature.figshare.com/ndownloader/files/14048069)

## Additional file 2

Fig S1. The histopathological findings in different groups. Histopathological examples of PCP (A,100X) and ACP (B,100X), the cytoplasmic staining pattern of BRAF V600E in PCP (C,400X), the immunonegative expression of BRAF V600E in ACP (D,400X), the nuclear and cytoplasmic staining pattern of  $\beta$ -Catenin in ACP (E,400X) and the membranous staining pattern of  $\beta$ -Catenin in PCPs (F,400X).

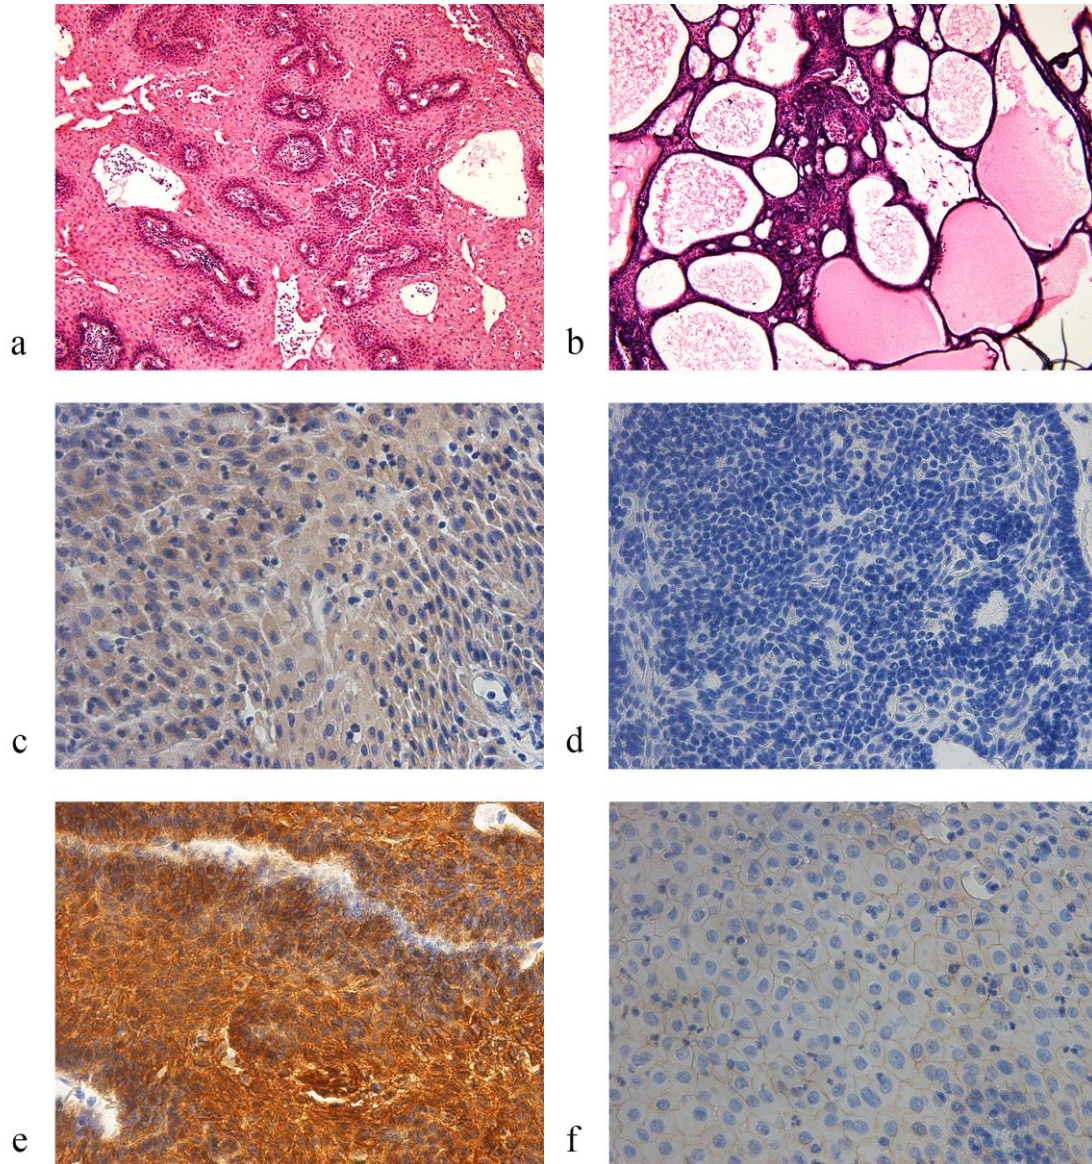

Supplement: Supplementary file [file 14048069]
